# Supplementary material for: Ternary doped porous carbon nanofibers with excellent ORR and OER performance for zinc–air batteries
Source: Royal Society of Chemistry journal article supplement (doi:10.1039/c8ta02416b), 2018-01-01
Supplement: c8ta02416b1.pdf [file c8ta02416b1.pdf]

### Supporting information

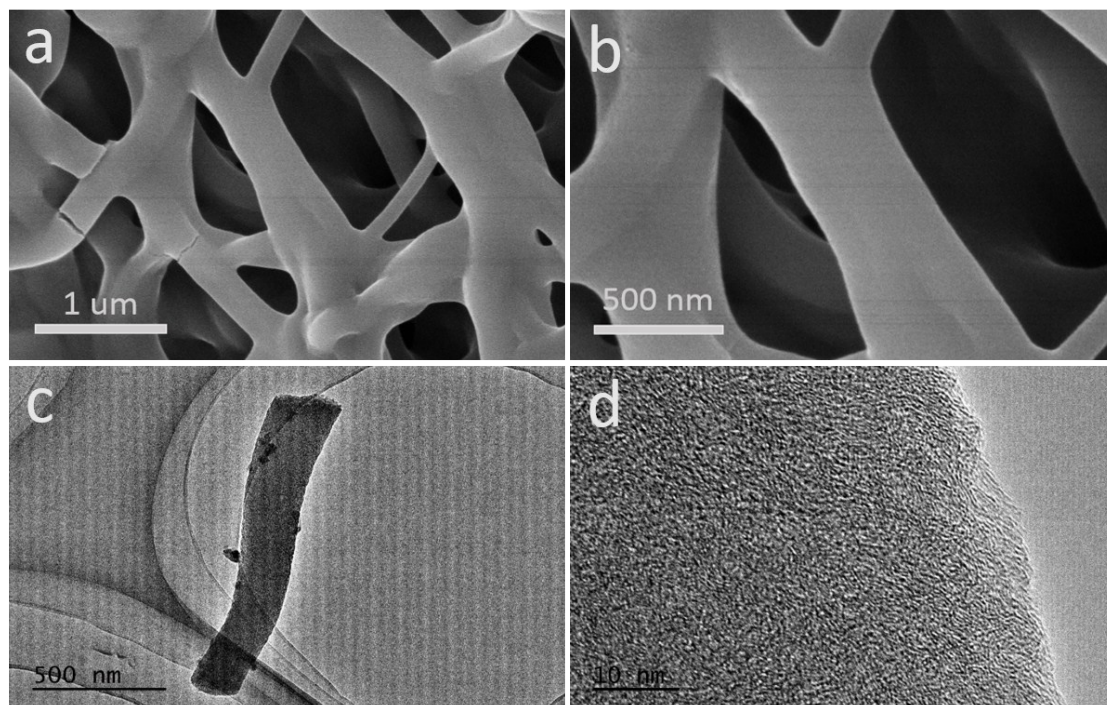

**Fig. S1** (a and b) SEM and (c and d) TEM images of CNFs.

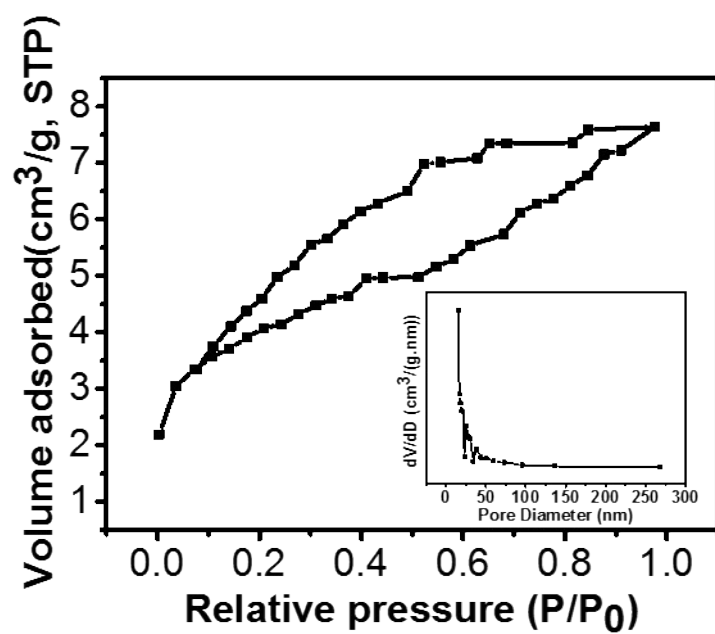

**Fig. S2** N<sub>2</sub> sorption isotherms and pore size distribution (inset) of CNFs.

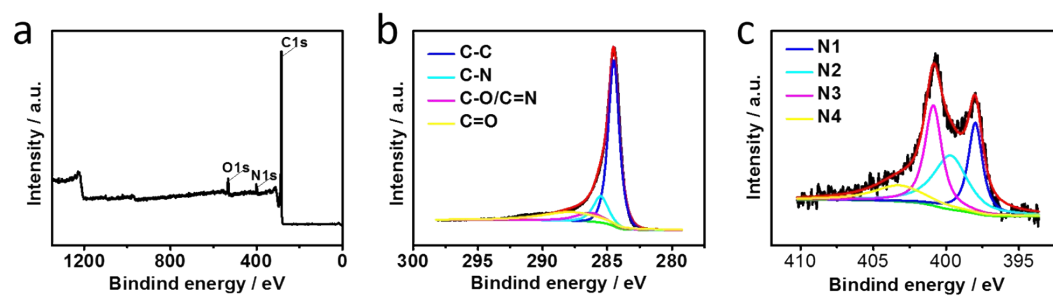

**Fig. S3** (a) XPS spectra, (b) High resolution XPS spectra of C1s and (c) N1s for CNFs.

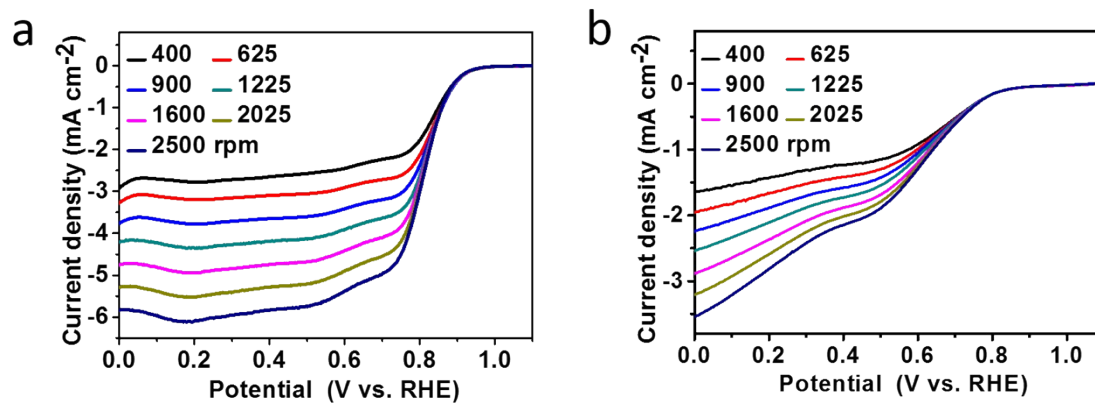

**Fig. S4** The LSV curves of (a) commercial Pt/C and (b) CNFs at different scan rates in 0.1M O<sub>2</sub>-saturated KOH solution.

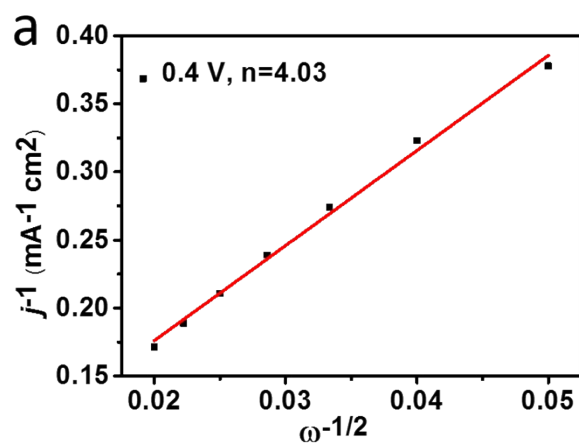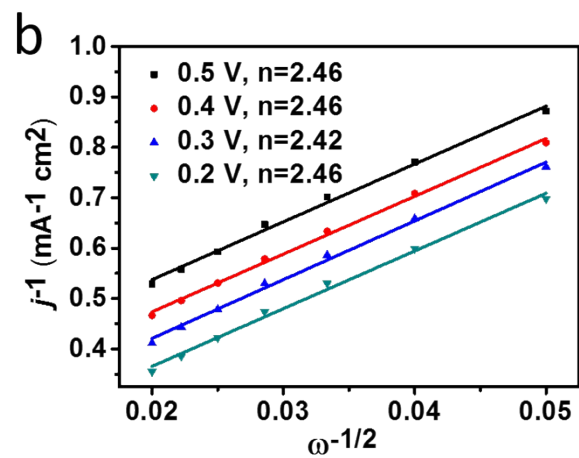

**Fig. S5** The K-L plots of (a) commercial Pt/C at the potential of 0.4 V and (b) CNFs at various potential of 0.2V, 0.3 V, 0.4V and 0.5V.

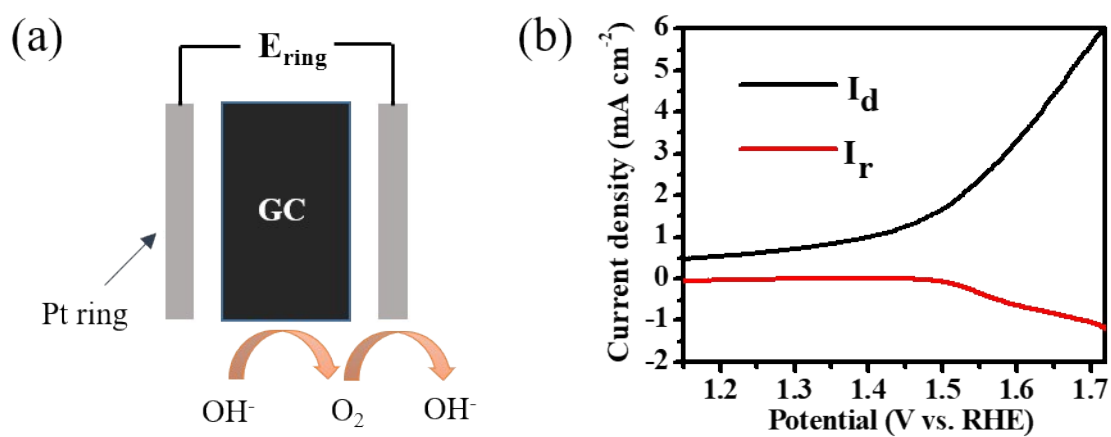

**Fig. S6** (a) the schematic diagram of RRDE test, (b) the OER test of NPFC catalyst on RRDE with the applied ring potential of 0.4V vs RHE at 1600 rpm in  $\text{N}_2$  saturated 0.1 M KOH aqueous solution.
